# Supplementary figures and images for: Community-linked maternal death review (CLMDR) to measure and prevent maternal mortality: a pilot study in rural Malawi
Source: HighWire-hosted journal article supplement (doi:10.1136/bmjopen-2015-007753), 2015-04-01

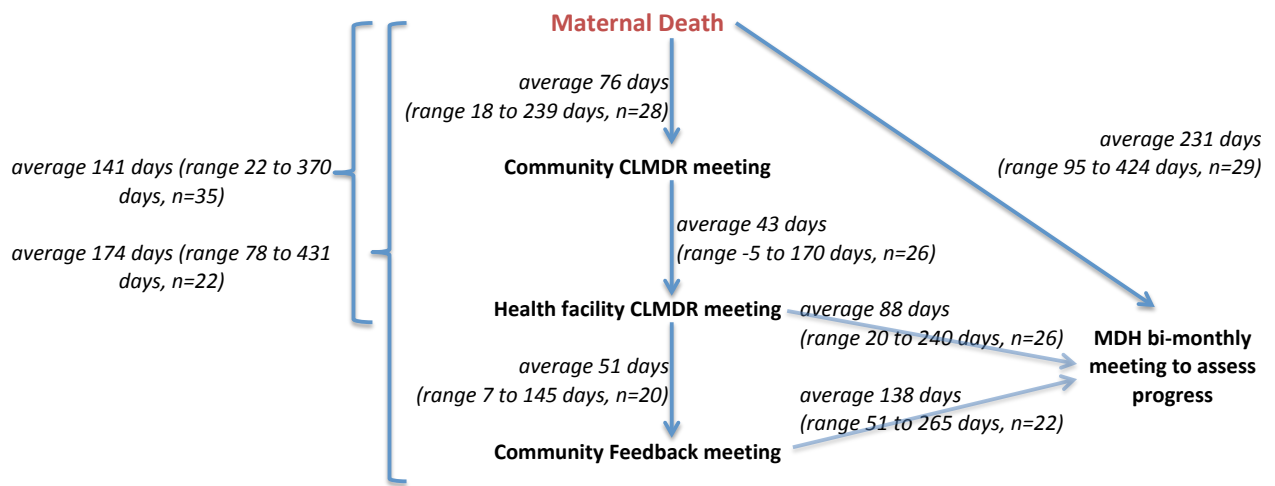

Supplement: bmjopen-2015-007753supp_appendix2.pdf [file bmjopen-2015-007753supp_appendix2.pdf]
